# Supplementary material for: A De Novo Expression Profiling of Anopheles funestus, Malaria Vector in Africa, Using 454 Pyrosequencing
Source: PubMed Central journal article supplement (PMC3045460; doi:10.1371/journal.pone.0017418), 2011-02-25
Supplement: pone.0017418.s001.pdf [file pone.0017418.s001.pdf]

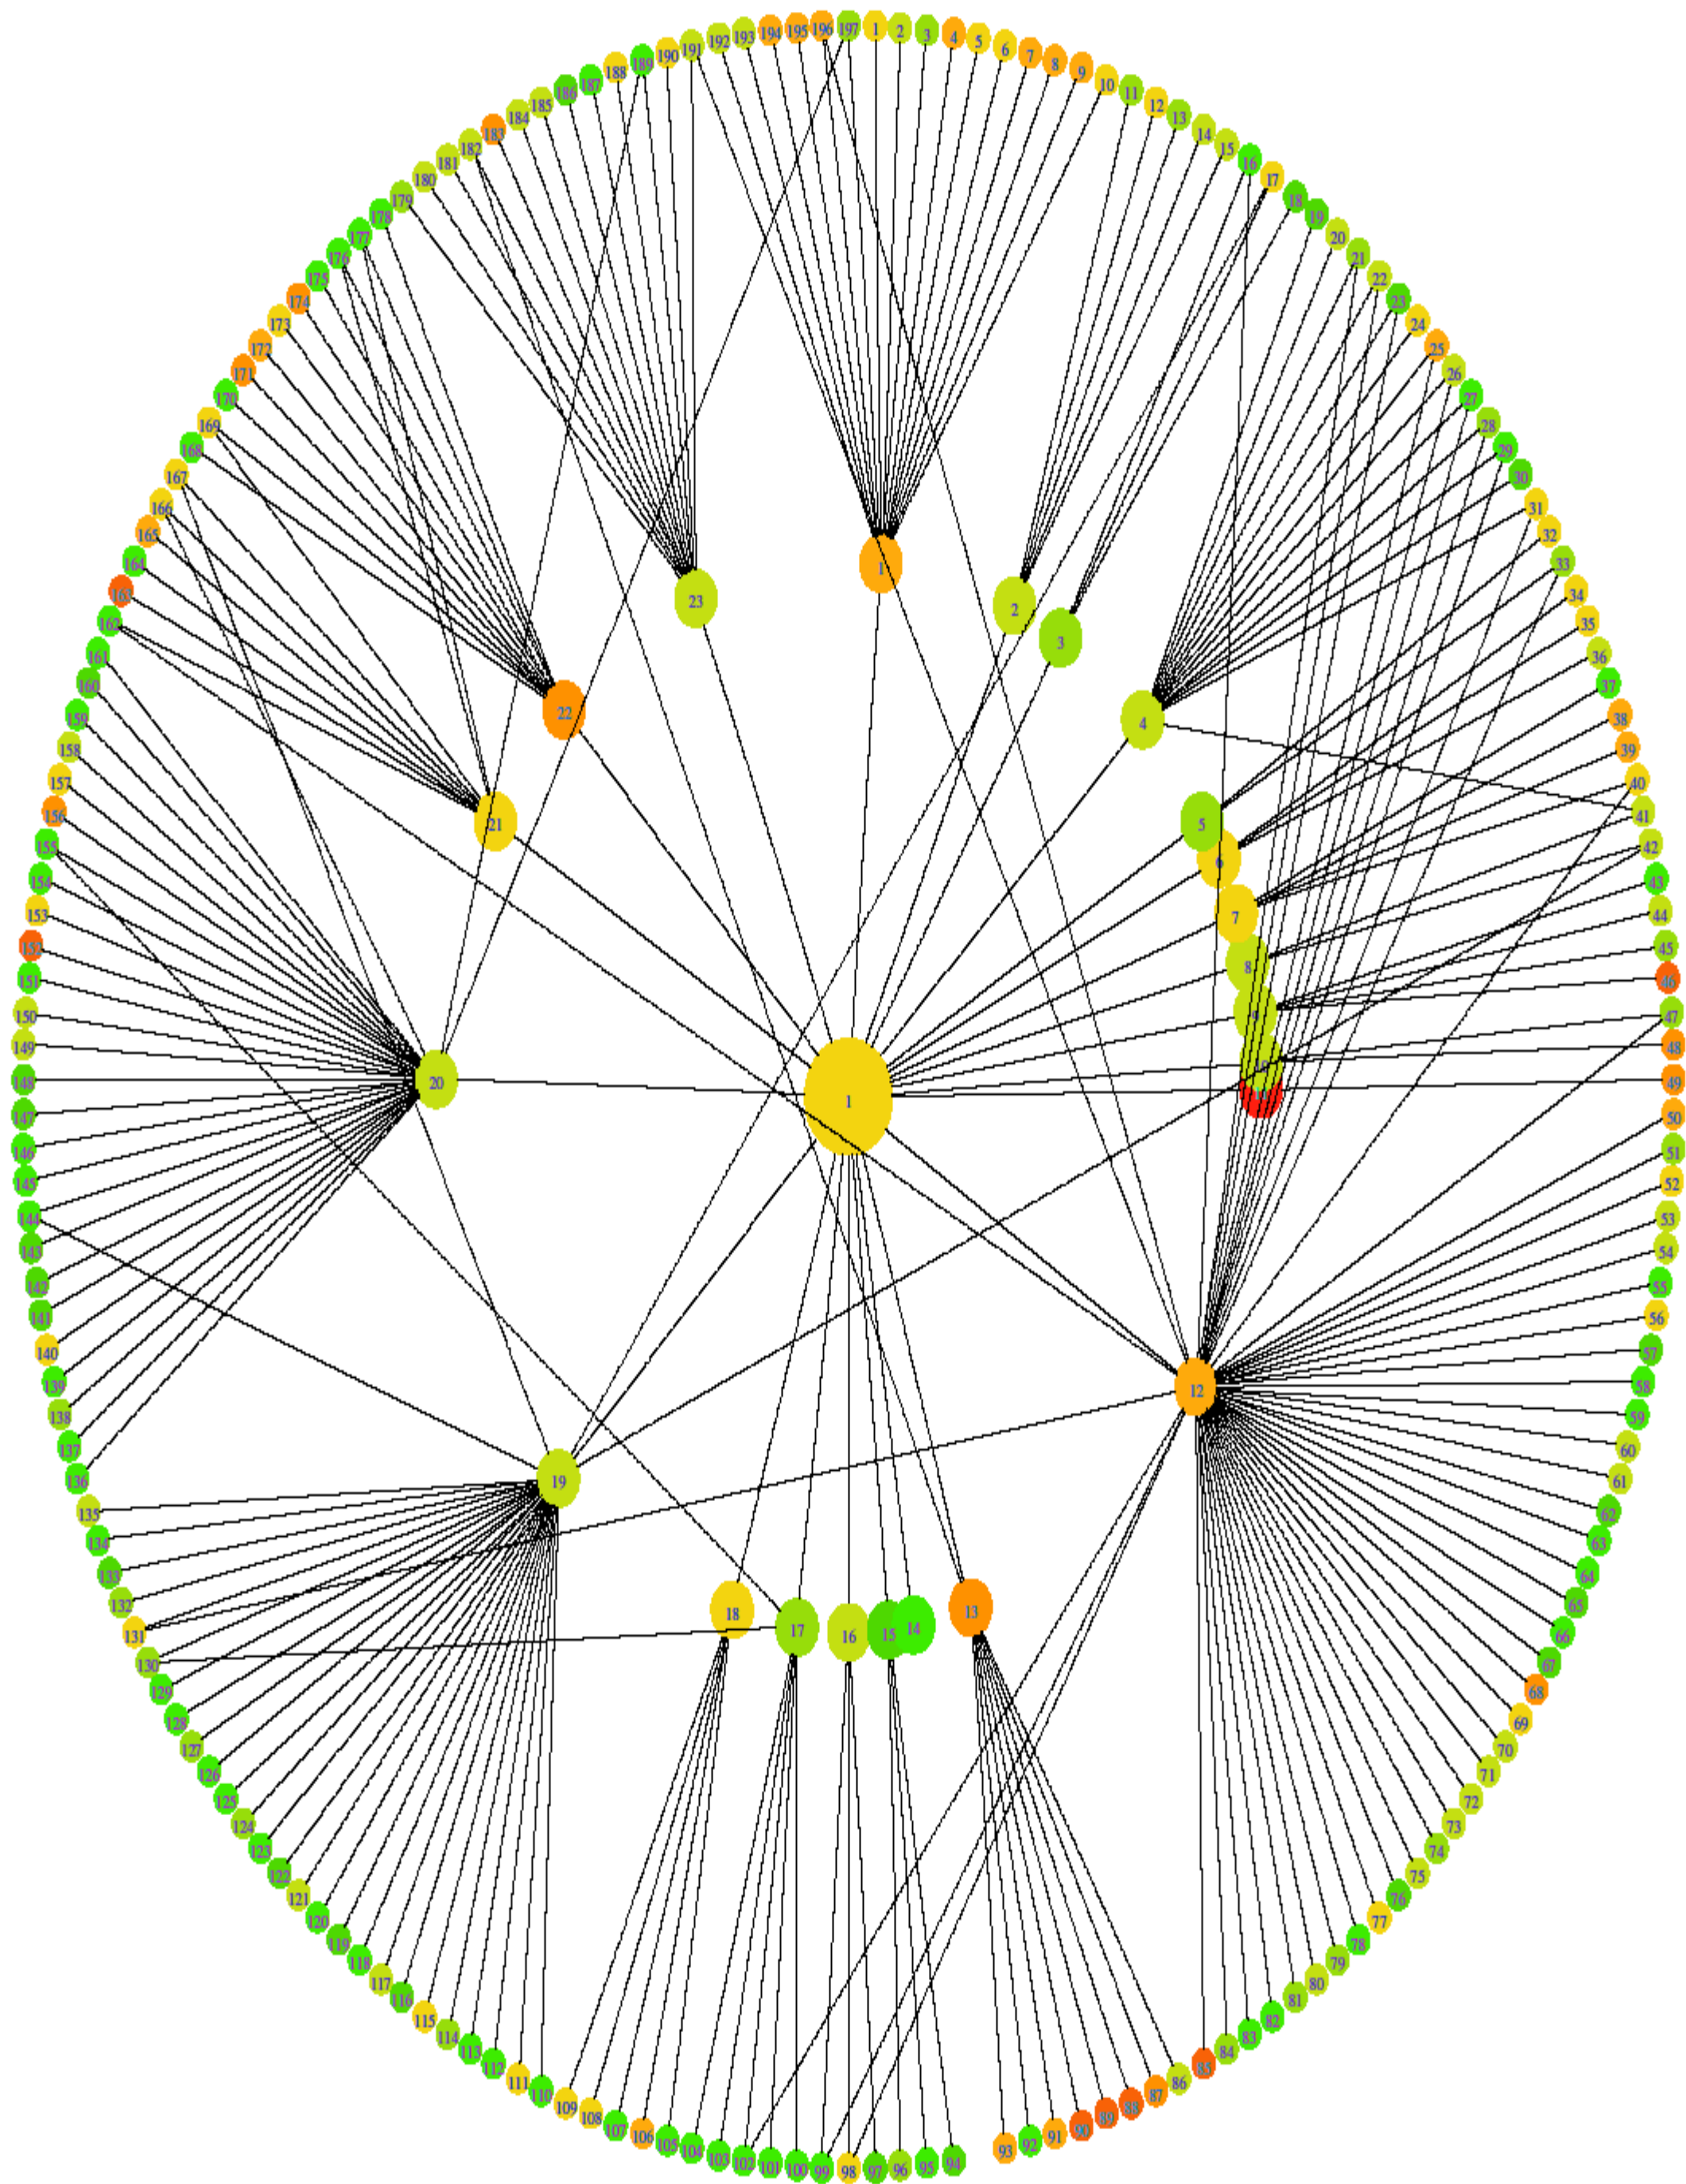

|    | GO ID     | <i>An. funestus</i> | <i>An. gambiae</i> | GO description                                |     |           |     |     |                                             |
|----|-----------|---------------------|--------------------|-----------------------------------------------|-----|-----------|-----|-----|---------------------------------------------|
| 1  | GO0008150 | 45022               | 88648              | biological_process                            |     |           |     |     |                                             |
| 1  | GO0008152 | 13456               | 29885              | metabolic process                             | 90  | GO0002253 | 9   | 33  | activation of immune response               |
| 2  | GO0051234 | 1005                | 1552               | establishment of localization                 | 91  | GO0002252 | 17  | 36  | immune effector process                     |
| 3  | GO0043473 | 10                  | 14                 | pigmentation                                  | 92  | GO0045058 | 6   | 6   | T cell selection                            |
| 4  | GO0016043 | 869                 | 1345               | cellular component organization               | 93  | GO0001776 | 3   | 7   | leukocyte homeostasis                       |
| 5  | GO0022610 | 21                  | 29                 | biological adhesion                           | 94  | GO0019954 | 5   | 6   | asexual reproduction                        |
| 6  | GO0065007 | 19211               | 35701              | biological regulation                         | 95  | GO0019953 | 3   | 3   | sexual reproduction                         |
| 7  | GO0051179 | 72                  | 144                | localization                                  | 96  | GO0032505 | 3   | 4   | reproduction of a single-celled organism    |
| 8  | GO0010926 | 226                 | 355                | anatomical structure formation                | 97  | GO0042546 | 4   | 5   | cell wall biogenesis                        |
| 9  | GO0040011 | 24                  | 38                 | locomotion                                    | 98  | GO0044091 | 1   | 2   | membrane biogenesis                         |
| 10 | GO0016265 | 21                  | 31                 | death                                         | 99  | GO0022613 | 3   | 3   | ribonucleoprotein complex biogenesis        |
| 11 | GO0001906 | 1                   | 11                 | cell killing                                  | 100 | GO0030447 | 4   | 4   | filamentous growth                          |
| 12 | GO0009987 | 7135                | 14658              | cellular process                              | 101 | GO0048590 | 3   | 3   | non-developmental growth                    |
| 13 | GO0002376 | 107                 | 327                | immune system process                         | 102 | GO0016049 | 15  | 16  | cell growth                                 |
| 14 | GO0016032 | 1                   | 1                  | viral reproduction                            | 103 | GO0035265 | 2   | 2   | organ growth                                |
| 15 | GO0000003 | 12                  | 15                 | reproduction                                  | 104 | GO0044110 | 1   | 1   | growth during symbiotic interaction         |
| 16 | GO0044085 | 8                   | 13                 | cellular component biogenesis                 | 105 | GO0042698 | 1   | 1   | ovulation cycle                             |
| 17 | GO0040007 | 55                  | 69                 | growth                                        | 106 | GO0022602 | 7   | 16  | ovulation cycle process                     |
| 18 | GO0048511 | 29                  | 53                 | rhythmic process                              | 107 | GO0007624 | 1   | 1   | ultradian rhythm                            |
| 19 | GO0032502 | 1102                | 1690               | developmental process                         | 108 | GO0007623 | 10  | 18  | circadian rhythm                            |
| 20 | GO0032501 | 202                 | 310                | multicellular organismal process              | 109 | GO0007622 | 9   | 16  | rhythmic behavior                           |
| 21 | GO0022414 | 80                  | 156                | reproductive process                          | 110 | GO0009838 | 1   | 1   | abscission                                  |
| 22 | GO0051704 | 75                  | 213                | multi-organism process                        | 111 | GO0010022 | 1   | 2   | meristem determinacy                        |
| 23 | GO0050896 | 1299                | 2037               | response to stimulus                          | 112 | GO0043934 | 6   | 6   | sporulation                                 |
|    |           |                     |                    |                                               | 113 | GO0016203 | 1   | 1   | muscle attachment                           |
| 1  | GO0018904 | 13                  | 26                 | organic ether metabolic process               | 114 | GO0009791 | 15  | 19  | post-embryonic development                  |
| 2  | GO0045730 | 2                   | 3                  | respiratory burst                             | 115 | GO0021700 | 13  | 25  | developmental maturation                    |
| 3  | GO0042445 | 57                  | 78                 | hormone metabolic process                     | 116 | GO0009790 | 7   | 8   | embryonic development                       |
| 4  | GO0019637 | 42                  | 99                 | organophosphate metabolic process             | 117 | GO0048856 | 231 | 356 | anatomical structure development            |
| 5  | GO0042440 | 29                  | 52                 | pigment metabolic process                     | 118 | GO0010228 | 1   | 1   | vegetative to reproductive phase transition |
| 6  | GO0019748 | 83                  | 150                | secondary metabolic process                   | 119 | GO0019827 | 6   | 7   | stem cell maintenance                       |
| 7  | GO0009058 | 772                 | 1623               | biosynthetic process                          | 120 | GO0001503 | 4   | 4   | ossification                                |
| 8  | GO0009056 | 524                 | 1204               | catabolic process                             | 121 | GO0048532 | 3   | 5   | anatomical structure arrangement            |
| 9  | GO0043170 | 2267                | 5095               | macromolecule metabolic process               | 122 | GO0007571 | 4   | 5   | age-dependent general metabolic decline     |
| 10 | GO0006066 | 261                 | 487                | alcohol metabolic process                     | 123 | GO0009847 | 1   | 1   | spore germination                           |
| 11 | GO0051656 | 34                  | 45                 | establishment of organelle localization       | 124 | GO0007389 | 104 | 146 | pattern specification process               |
| 12 | GO0051236 | 16                  | 27                 | establishment of RNA localization             | 125 | GO0009561 | 1   | 1   | megagametogenesis                           |
| 13 | GO0051649 | 190                 | 270                | establishment of localization in cell         | 126 | GO0030588 | 2   | 2   | pseudocleavage                              |
| 14 | GO0006810 | 701                 | 1116               | transport                                     | 127 | GO0009653 | 311 | 431 | anatomical structure morphogenesis          |
| 15 | GO0045184 | 64                  | 93                 | establishment of protein localization         | 128 | GO0031077 | 1   | 1   | post-embryonic camera-type eye development  |
| 16 | GO0033059 | 2                   | 2                  | cellular pigmentation                         | 129 | GO0031076 | 1   | 1   | embryonic camera-type eye development       |
| 17 | GO0048066 | 3                   | 6                  | pigmentation during development               | 130 | GO0048589 | 28  | 40  | developmental growth                        |
| 18 | GO0043476 | 4                   | 5                  | pigment accumulation                          | 131 | GO0048869 | 252 | 443 | cellular developmental process              |
| 19 | GO0043954 | 4                   | 5                  | cellular component maintenance                | 132 | GO0022611 | 5   | 7   | dormancy process                            |
| 20 | GO0043933 | 225                 | 373                | macromolecular complex subunit organization   | 133 | GO0007568 | 7   | 8   | aging                                       |
| 21 | GO0030030 | 41                  | 55                 | cell projection organization                  | 134 | GO0007566 | 1   | 1   | embryo implantation                         |
| 22 | GO0006996 | 251                 | 383                | organelle organization                        | 135 | GO0035188 | 2   | 3   | hatching                                    |
| 23 | GO0034330 | 20                  | 25                 | cell junction organization                    | 136 | GO0035314 | 1   | 1   | scab formation                              |
| 24 | GO0022411 | 33                  | 62                 | cellular component disassembly                | 137 | GO0048316 | 1   | 1   | seed development                            |
| 25 | GO0045229 | 6                   | 15                 | external encapsulating structure organization | 138 | GO0007632 | 3   | 4   | visual behavior                             |
| 26 | GO0043062 | 12                  | 18                 | extracellular structure organization          | 139 | GO0043480 | 1   | 1   | pigment accumulation in tissues             |
| 27 | GO0070193 | 3                   | 3                  | synaptonemal complex organization             | 140 | GO0048871 | 3   | 6   | multicellular organismal homeostasis        |
| 28 | GO0016044 | 55                  | 78                 | membrane organization                         | 141 | GO0030537 | 4   | 5   | larval behavior                             |
| 29 | GO0007028 | 3                   | 3                  | cytoplasm organization                        | 142 | GO0009606 | 4   | 5   | tropism                                     |
| 30 | GO0032989 | 45                  | 56                 | cellular component morphogenesis              | 143 | GO0030534 | 9   | 11  | adult behavior                              |
| 31 | GO0006323 | 4                   | 7                  | DNA packaging                                 | 144 | GO0007275 | 4   | 4   | multicellular organismal development        |

|    |           |       |       |                                                                        |     |           |      |       |                                                                  |
|----|-----------|-------|-------|------------------------------------------------------------------------|-----|-----------|------|-------|------------------------------------------------------------------|
| 32 | GO0051825 | 1     | 2     | adhesion to other organism during symbiotic interaction                | 145 | GO0008340 | 1    | 1     | determination of adult lifespan                                  |
| 33 | GO0007155 | 20    | 27    | cell adhesion                                                          | 146 | GO0009845 | 1    | 1     | seed germination                                                 |
| 34 | GO0050789 | 18154 | 33912 | regulation of biological process                                       | 147 | GO0001763 | 15   | 18    | morphogenesis of a branching structure                           |
| 35 | GO0065009 | 539   | 937   | regulation of molecular function                                       | 148 | GO0048771 | 4    | 5     | tissue remodeling                                                |
| 36 | GO0065008 | 518   | 852   | regulation of biological quality                                       | 149 | GO0033555 | 3    | 5     | multicellular organismal response to stress                      |
| 37 | GO0051674 | 1     | 1     | localization of cell                                                   | 150 | GO0003008 | 77   | 122   | system process                                                   |
| 38 | GO0033036 | 33    | 71    | macromolecule localization                                             | 151 | GO0032898 | 1    | 1     | neurotrophin production                                          |
| 39 | GO0031503 | 2     | 5     | protein complex localization                                           | 152 | GO0050879 | 1    | 4     | multicellular organismal movement                                |
| 40 | GO0051641 | 35    | 66    | cellular localization                                                  | 153 | GO0050878 | 7    | 12    | regulation of body fluid levels                                  |
| 41 | GO0022607 | 167   | 261   | cellular component assembly                                            | 154 | GO0030431 | 2    | 2     | sleep                                                            |
| 42 | GO0048646 | 59    | 93    | anatomical structure formation involved in morphogenesis               | 155 | GO0035264 | 1    | 1     | multicellular organism growth                                    |
| 43 | GO0031987 | 1     | 1     | locomotion involved in locomotory behavior                             | 156 | GO0001816 | 5    | 13    | cytokine production                                              |
| 44 | GO0033058 | 2     | 3     | directional locomotion                                                 | 157 | GO0050817 | 2    | 4     | coagulation                                                      |
| 45 | GO0042330 | 18    | 25    | taxis                                                                  | 158 | GO0007586 | 2    | 3     | digestion                                                        |
| 46 | GO0052192 | 2     | 7     | movement in environment of other organism during symbiotic interaction | 159 | GO0007585 | 3    | 3     | respiratory gaseous exchange                                     |
| 47 | GO0008219 | 19    | 27    | cell death                                                             | 160 | GO0042303 | 12   | 15    | molting cycle                                                    |
| 48 | GO0016271 | 1     | 3     | tissue death                                                           | 161 | GO0035187 | 1    | 1     | hatching behavior                                                |
| 49 | GO0001909 | 1     | 3     | leukocyte mediated cytotoxicity                                        | 162 | GO0048610 | 9    | 9     | reproductive cellular process                                    |
| 50 | GO0045103 | 3     | 7     | intermediate filament-based process                                    | 163 | GO0019098 | 6    | 25    | reproductive behavior                                            |
| 51 | GO0008037 | 12    | 16    | cell recognition                                                       | 164 | GO0009566 | 3    | 3     | fertilization                                                    |
| 52 | GO0032940 | 22    | 43    | secretion by cell                                                      | 165 | GO0022415 | 8    | 18    | viral reproductive process                                       |
| 53 | GO0022406 | 3     | 5     | membrane docking                                                       | 166 | GO0048609 | 25   | 47    | reproductive process in a multicellular organism                 |
| 54 | GO0022402 | 101   | 150   | cell cycle process                                                     | 167 | GO0003006 | 26   | 50    | reproductive developmental process                               |
| 55 | GO0032196 | 3     | 3     | transposition                                                          | 168 | GO0042710 | 2    | 2     | biofilm formation                                                |
| 56 | GO0006413 | 1     | 2     | translational initiation                                               | 169 | GO0007618 | 1    | 2     | mating                                                           |
| 57 | GO0007059 | 4     | 5     | chromosome segregation                                                 | 170 | GO0048874 | 2    | 2     | homeostasis of number of cells in a free-living population       |
| 58 | GO0010118 | 1     | 1     | stomatal movement                                                      | 171 | GO0051707 | 43   | 134   | response to other organism                                       |
| 59 | GO0016037 | 2     | 2     | absorption of light                                                    | 172 | GO0051705 | 4    | 9     | behavioral interaction between organisms                         |
| 60 | GO0051651 | 12    | 20    | maintenance of location in cell                                        | 173 | GO0051703 | 1    | 2     | intraspecies interaction between organisms                       |
| 61 | GO0007017 | 57    | 83    | microtubule-based process                                              | 174 | GO0044419 | 17   | 47    | interspecies interaction between organisms                       |
| 62 | GO0007163 | 27    | 33    | establishment or maintenance of cell polarity                          | 175 | GO0000746 | 2    | 2     | conjugation                                                      |
| 63 | GO0035212 | 1     | 1     | cell competition in a multicellular organism                           | 176 | GO0007567 | 1    | 1     | parturition                                                      |
| 64 | GO0007272 | 9     | 9     | ensheathment of neurons                                                | 177 | GO0007565 | 1    | 1     | female pregnancy                                                 |
| 65 | GO0032506 | 18    | 22    | cytokinetic process                                                    | 178 | GO0009292 | 1    | 1     | genetic transfer                                                 |
| 66 | GO0009846 | 1     | 1     | pollen germination                                                     | 179 | GO0009628 | 124  | 158   | response to abiotic stimulus                                     |
| 67 | GO0030029 | 51    | 57    | actin filament-based process                                           | 180 | GO0007610 | 94   | 148   | behavior                                                         |
| 68 | GO0006276 | 1     | 3     | plasmid maintenance                                                    | 181 | GO0042221 | 316  | 460   | response to chemical stimulus                                    |
| 69 | GO0034621 | 87    | 147   | cellular macromolecular complex subunit organization                   | 182 | GO0006955 | 27   | 42    | immune response                                                  |
| 70 | GO0007049 | 7     | 11    | cell cycle                                                             | 183 | GO0009607 | 53   | 168   | response to biotic stimulus                                      |
| 71 | GO0019725 | 62    | 99    | cellular homeostasis                                                   | 184 | GO0006950 | 221  | 341   | response to stress                                               |
| 72 | GO0003001 | 9     | 15    | generation of a signal involved in cell-cell signaling                 | 185 | GO0009605 | 166  | 260   | response to external stimulus                                    |
| 73 | GO0008283 | 25    | 40    | cell proliferation                                                     | 186 | GO0009719 | 70   | 87    | response to endogenous stimulus                                  |
| 74 | GO0016192 | 46    | 65    | vesicle-mediated transport                                             | 187 | GO0014823 | 2    | 2     | response to activity                                             |
| 75 | GO0070882 | 9     | 15    | cell wall organization or biogenesis                                   | 188 | GO0014874 | 1    | 2     | response to stimulus involved in regulation of muscle adaptation |
| 76 | GO0016458 | 17    | 19    | gene silencing                                                         | 189 | GO0002021 | 1    | 1     | response to dietary excess                                       |
| 77 | GO0006949 | 1     | 2     | syncytium formation                                                    | 190 | GO0051606 | 73   | 124   | detection of stimulus                                            |
| 78 | GO0007302 | 1     | 1     | nurse cell nucleus anchoring                                           | 191 | GO0051716 | 150  | 241   | cellular response to stimulus                                    |
| 79 | GO0006928 | 47    | 67    | cell motion                                                            | 192 | GO0015976 | 2    | 3     | carbon utilization                                               |
| 80 | GO0007154 | 222   | 345   | cell communication                                                     | 193 | GO0055114 | 9    | 15    | oxidation reduction                                              |
| 81 | GO0055085 | 71    | 101   | transmembrane transport                                                | 194 | GO0006807 | 1588 | 3768  | nitrogen compound metabolic process                              |
| 82 | GO0007569 | 3     | 3     | cell aging                                                             | 195 | GO0044238 | 2569 | 5635  | primary metabolic process                                        |
| 83 | GO0006903 | 4     | 4     | vesicle targeting                                                      | 196 | GO0044237 | 5230 | 11635 | cellular metabolic process                                       |
| 84 | GO0051301 | 23    | 30    | cell division                                                          | 197 | GO0044236 | 7    | 9     | multicellular organismal metabolic process                       |
| 85 | GO0001775 | 40    | 169   | cell activation                                                        |     |           |      |       |                                                                  |
| 86 | GO0050900 | 4     | 6     | leukocyte migration                                                    |     |           |      |       |                                                                  |
| 87 | GO0002507 | 1     | 3     | tolerance induction                                                    |     |           |      |       |                                                                  |
| 88 | GO0019882 | 5     | 22    | antigen processing and presentation                                    |     |           |      |       |                                                                  |
| 89 | GO0045321 | 35    | 149   | leukocyte activation                                                   |     |           |      |       |                                                                  |
